# Supplementary material for: Cobalt-based nanosheet arrays as efficient electrocatalysts for overall water splitting
Source: Royal Society of Chemistry journal article supplement (doi:10.1039/c7ta04248e), 2017-01-01
Supplement: c7ta04248e1.pdf [file c7ta04248e1.pdf]

## Supporting Information

# Cobalt-based Nanosheet Arrays as Efficient Electrocatalysts for Overall Water Splitting

Bingrui Liu,<sup>a</sup> Ning Zhang,<sup>a,b\*</sup> and Mingming Ma<sup>a\*</sup>

*a. CAS Key Laboratory of Soft Matter Chemistry, iChEM (Collaborative Innovation Center of Chemistry for Energy Materials), Department of Chemistry, University of Science and Technology of China, Hefei, Anhui 230026, China*

*b. Department of Biology and Environmental Engineering, Hefei University, Hefei, Anhui 230022, China*

*\*E-mail: zlab@ustc.edu.cn; mma@ustc.edu.cn*

## Catalogue

**Figure S1.** SEM image of as prepared electrodeposition cobalt alloy and CoFeB alloy.

**Figure S2.** LSV of Co NS synthesized at different Co: P molar ratio.

**Figure S3.** XRD spectrum of Co NS sample.

**Figure S4.** EDX spectrum of Co NS sample.

**Figure S5.** XPS spectrum for Co NS sample.

**Figure S6.** Raman spectrum of Co NS sample.

**Figure S7.** Nyquist plots of electrocatalysts for HER.

**Figure S8.** Cyclic voltammograms recorded for the Co NS.

**Figure S9.** SEM image and XRD spectrum of as-prepared CoFeB alloy

**Figure S10.** LSV of CoFeBO NS synthesized at different Co: Fe molar ratio.

**Figure S11.** XRD spectrum of CoFeBO NS sample.

**Figure S12.** EDX spectrum of CoFeBO NS sample.

**Figure S13.** XPS spectrum of CoFeBO NS sample.

**Figure S14.** Raman spectrum of CoFeBO NS sample.

**Figure S15.** Cyclic voltammograms recorded for the CoFeBO NS and Co NS.

**Table S1.** Comparison of the HER performance of non-noble metal based electrocatalysts.

**Table S2.** Comparison of the OER performance of non-noble metal based electrocatalysts.

**Table S3.** Comparison of the overall water splitting performance of non-noble metal based electrocatalysts.

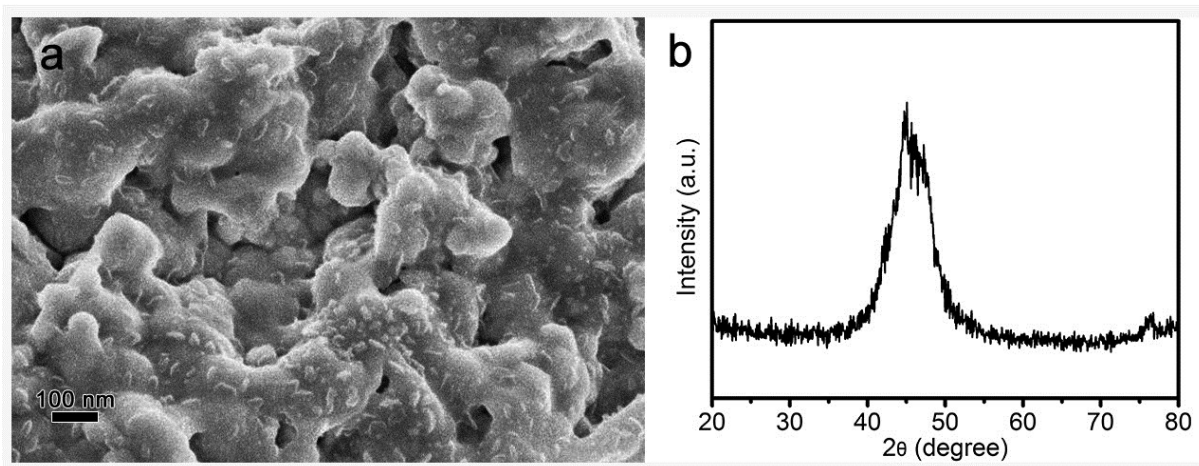

**Figure S1.** (a) SEM image and (b) XRD spectrum of as-deposited cobalt alloy.

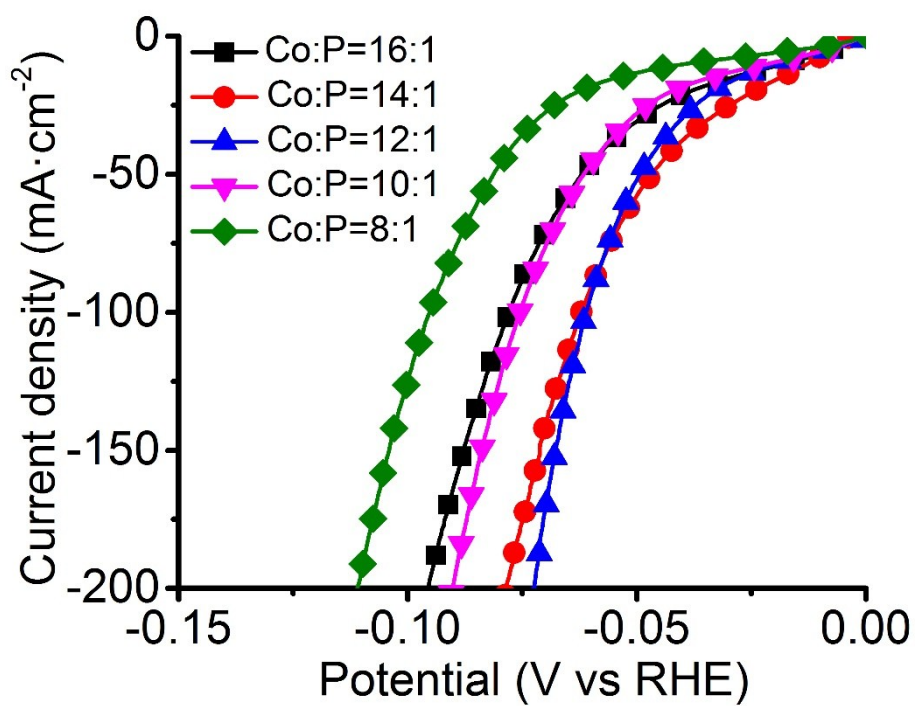

**Figure S2.** Linear sweep voltammetry of Co NS (for HER reaction) synthesized with different  $\text{CoSO}_4$ : $\text{NaH}_2\text{PO}_2$  molar ratio.

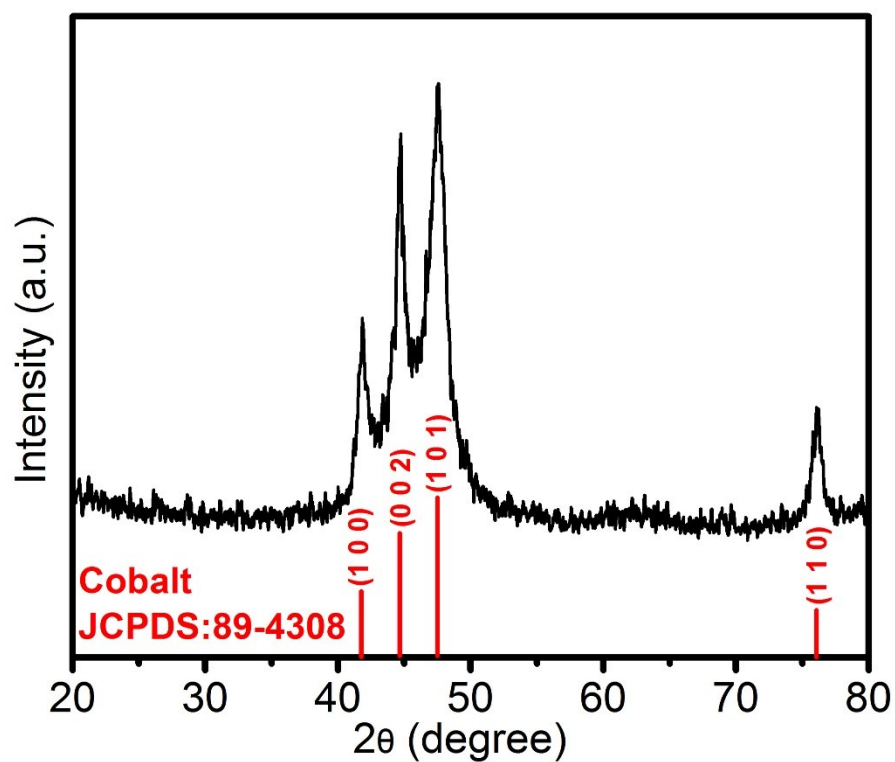

**Figure S3.** XRD spectrum of Co NS sample.

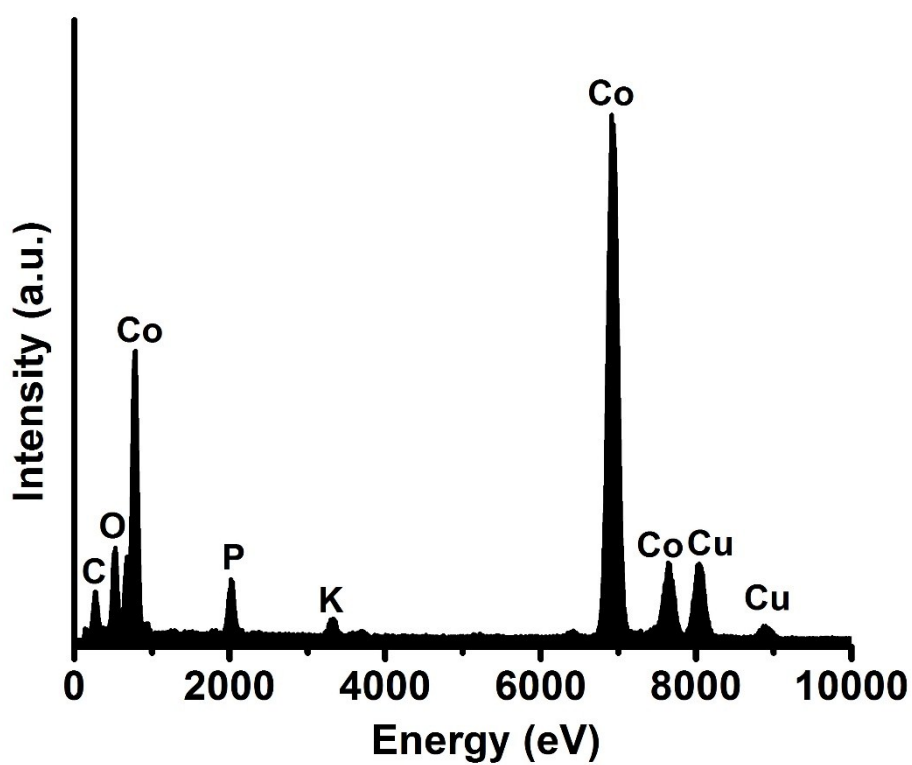

**Figure S4.** EDX spectrum of Co NS sample.

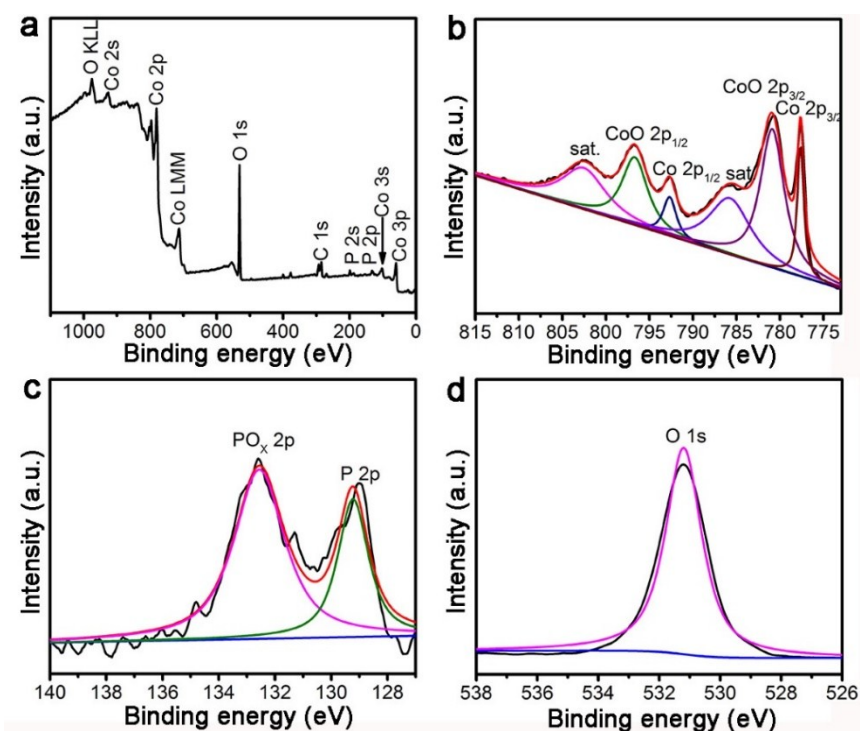

**Figure S5.** a) XPS survey spectrum for Co NS; core level of XPS spectrum in the (b) Co 2p, (c) P 2p and (d) O 1s for Co NS.

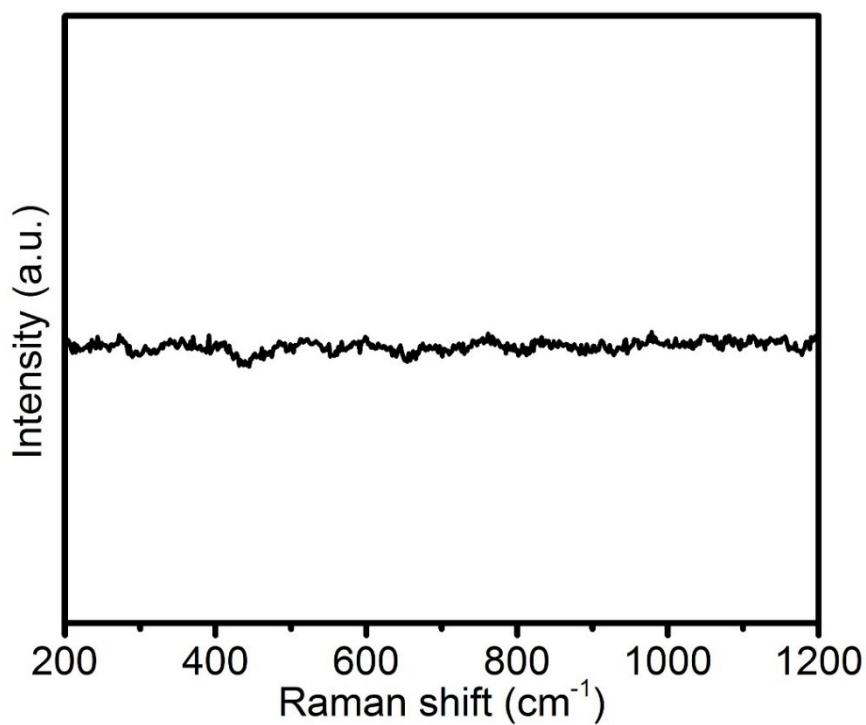

**Figure S6.** Raman spectrum of Co NS sample. There are no obviously peaks in the Raman spectrum of the Co NS before and after the 1h of pre-reduction, which further confirms that the surface of the Co NS catalysts is comprised of cobalt metal.

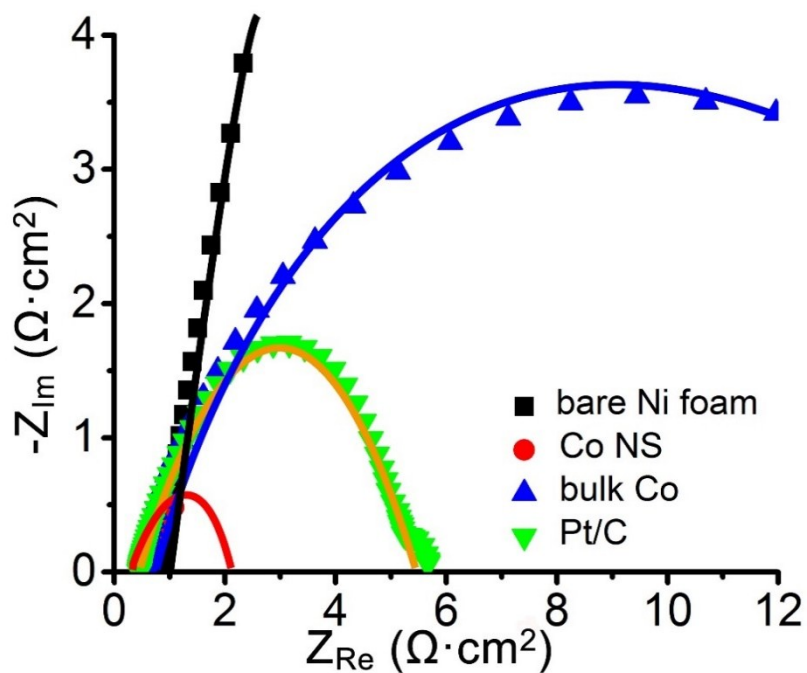

**Figure S7.** Nyquist plots of bare NF, Co NS, bulk Co and 20% Pt/C electrodes for HER in 1.0 M KOH.

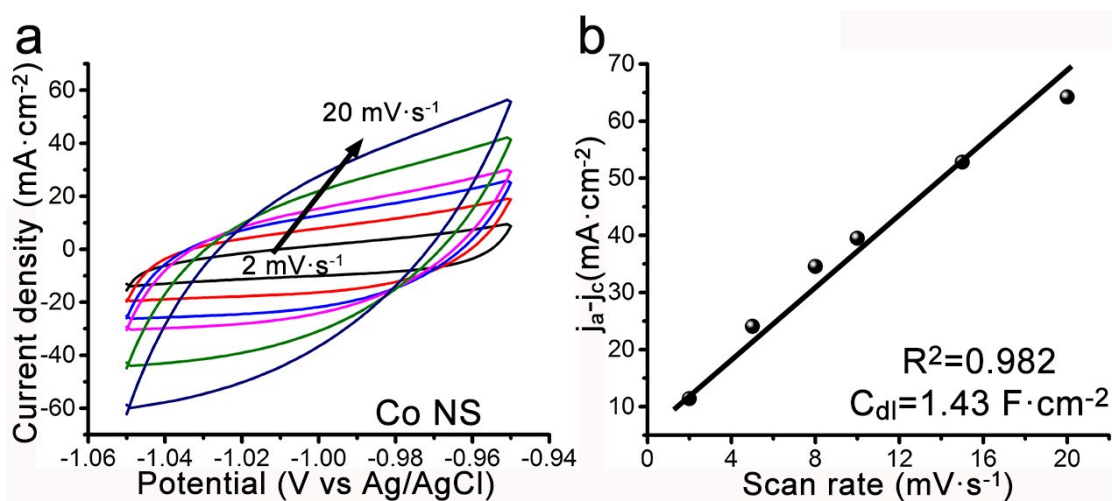

**Figure S8.** (a) Cyclic voltammograms recorded for the Co NS electrode at various scan rates in the non-Faradaic region in 1.0 M KOH. (b) Scan rate dependence of the current densities of the Co NS electrode at -1 V vs Ag/AgCl. The slope of the lines in (b) is the effective electrochemically active surface area of Co NS electrodes.

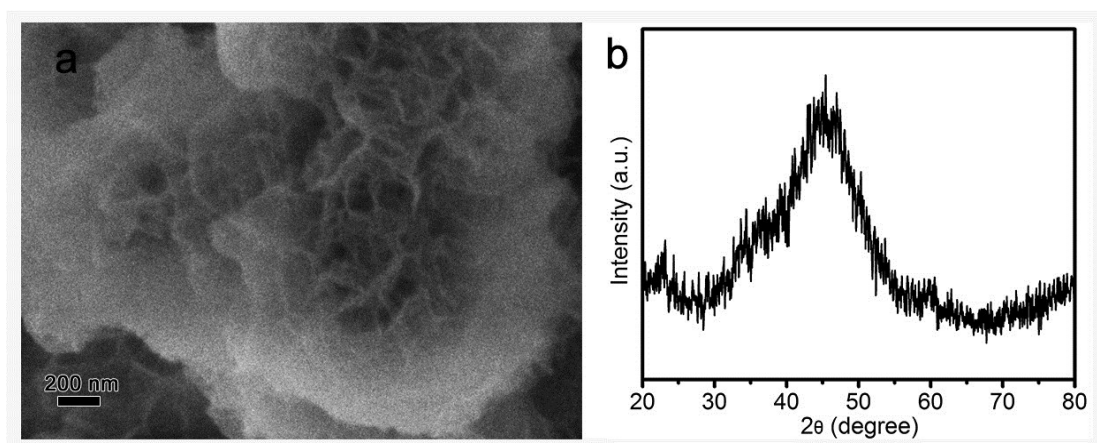

**Figure S9.** (a) SEM image and (b) XRD spectrum of as-prepared CoFeB alloy.

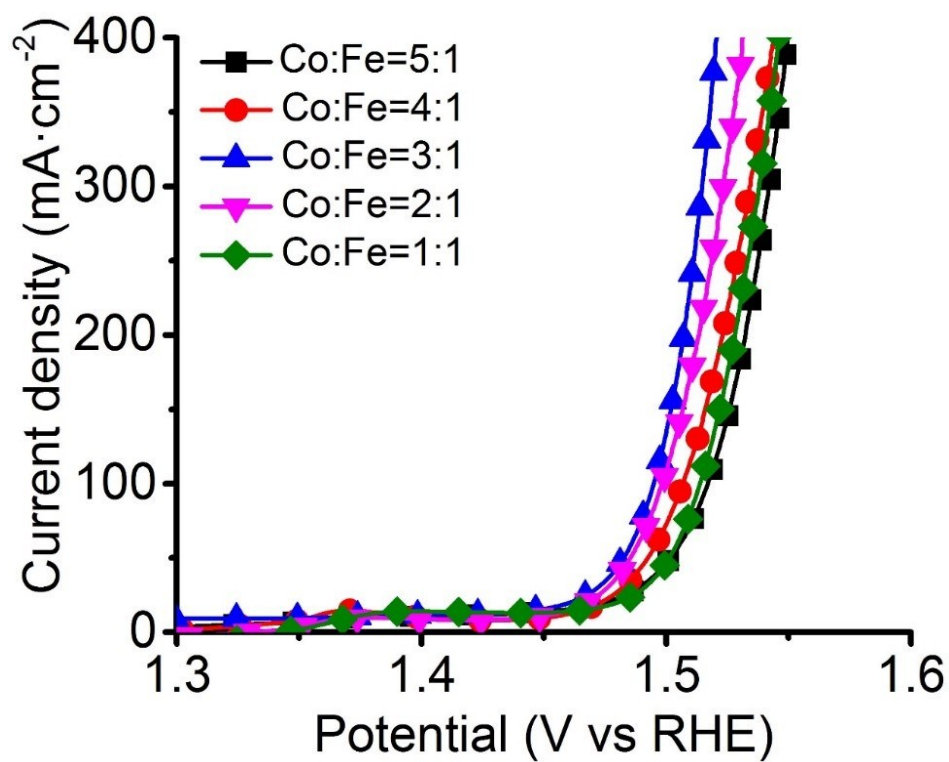

**Figure S10.** Linear sweep voltammetry of CoFeBO NS (for OER reaction) synthesized with different  $\text{CoCl}_2 : \text{FeSO}_4$  molar ratio. The molar ratio of B: (Co+Fe) was fixed at 4:1.

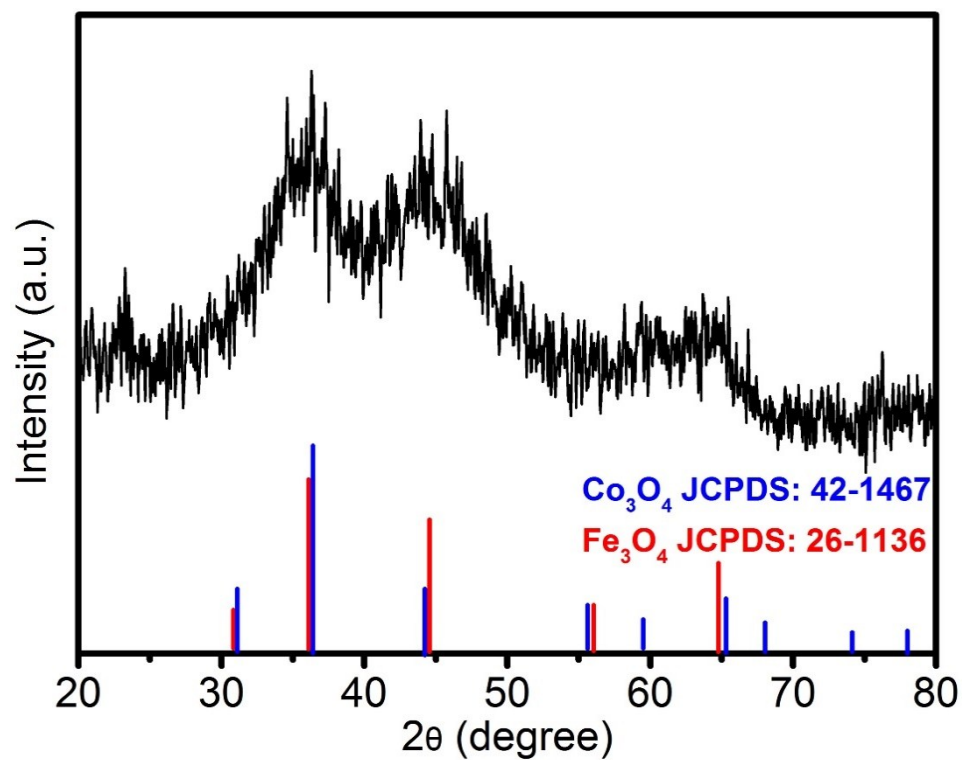

Figure S11. XRD spectrum of CoFeBO NS sample.

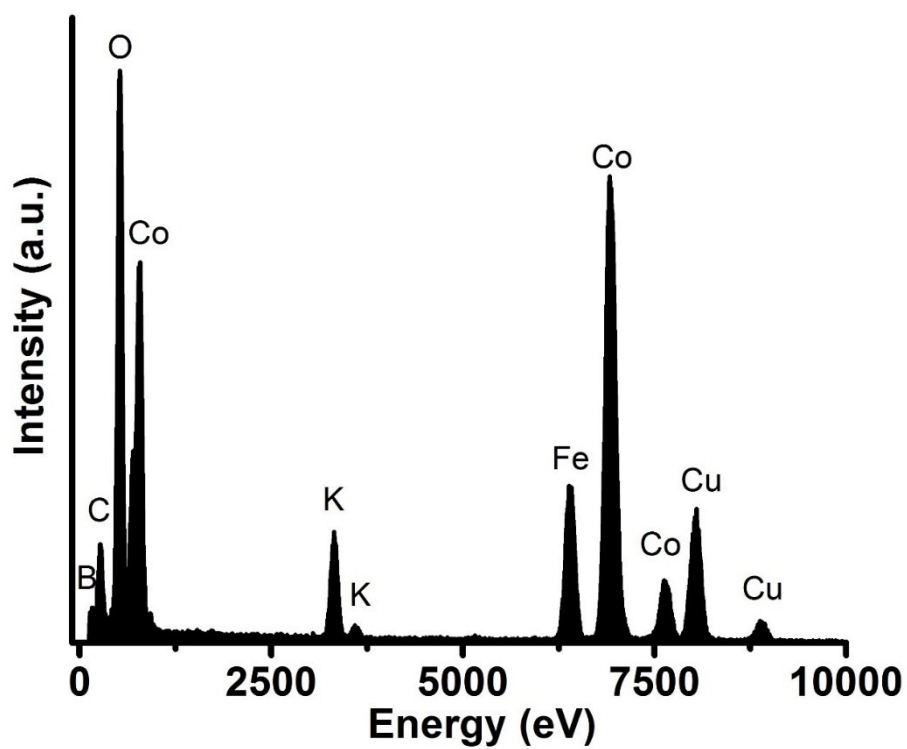

Figure S12. EDX spectrum of CoFeBO NS sample.



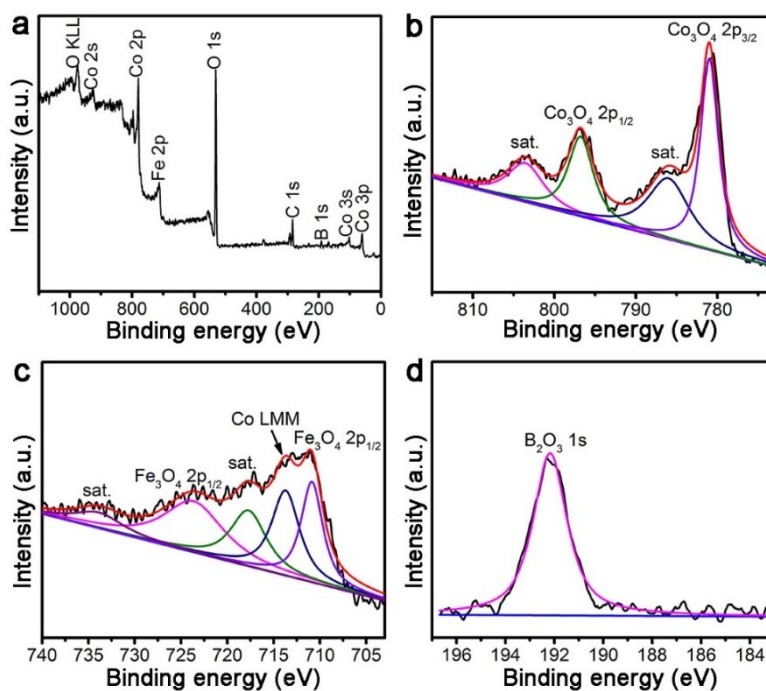

**Figure S13.** (a) XPS survey spectrum for CoFeBO NS; core level of XPS spectrum in the (b) Co 2p, (c) Fe 2p, and (d) B 1s for CoFeBO NS.

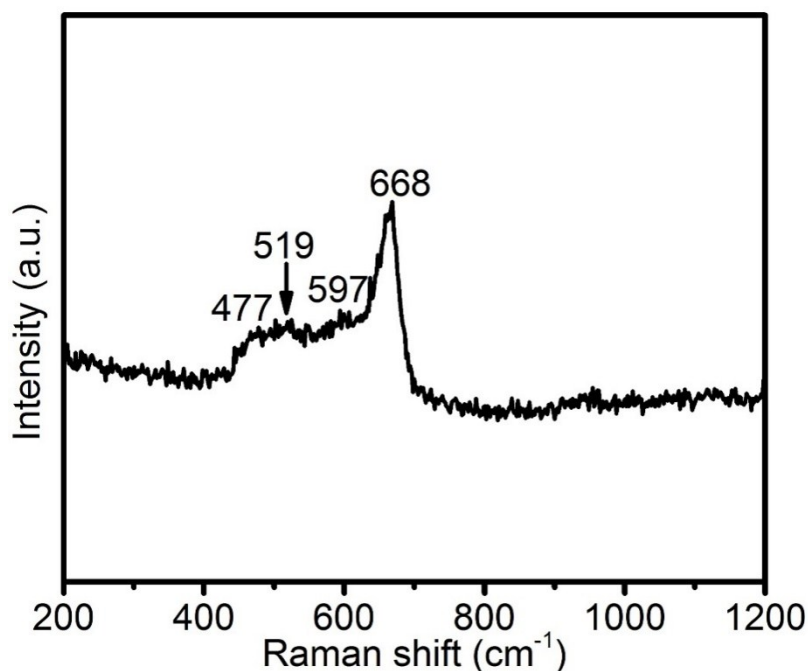

**Figure S14.** Raman spectrum of CoFeBO NS sample. The bands at 477, 519, 597 and 668  $\text{cm}^{-1}$  are ascribed to the  $E_g$ ,  $F_{2g}^1$  and  $F_{2g}^2$  and  $A_{1g}$  characteristic mode of  $\text{Co}_3\text{O}_4$ , respectively (J. Phys. C: Solid State Phys, **1988**, 21 L199-L201). It is also likely that some  $\text{Fe}_3\text{O}_4$  contributes to the intensity of the 668  $\text{cm}^{-1}$  band (Electrochimica acta, **1992**, 37: 2747-2754). These data suggests that the surface of the CoFeBO NS sample is covered by a layer of metal oxides, including  $\text{Co}_3\text{O}_4$  and magnetite.

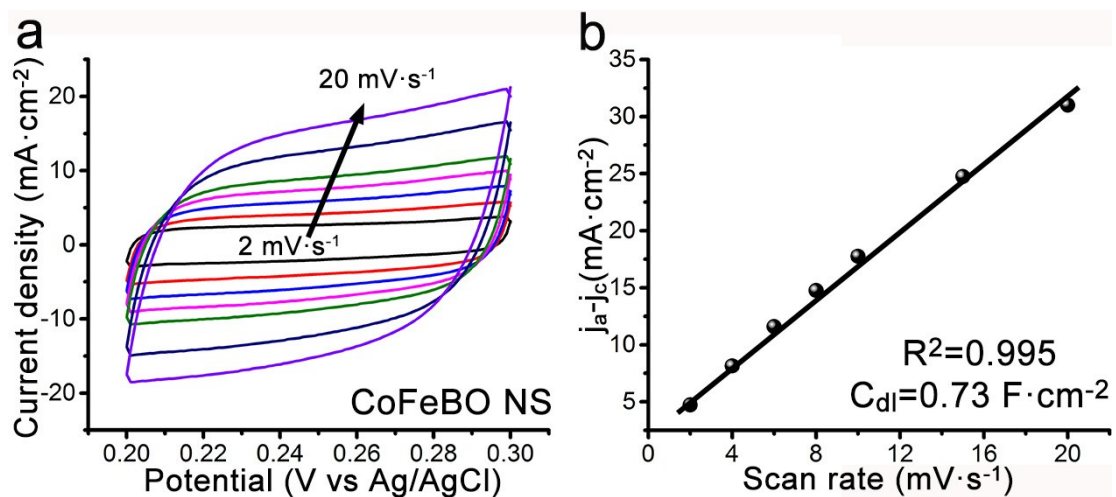

**Figure S15.** (a) Cyclic voltammograms recorded for the CoFeBO NS electrode at various scan rates in the non-Faradaic region in 1.0 M KOH. (b) Scan rate dependence of the current densities of the CoFeBO NS electrode at 0.25V vs Ag/AgCl . The slope of the lines in (b) is the effective electrochemically active surface area of CoFeBO electrodes.

**Table S1.** Comparison of Co NS and other non-noble metal electrocatalysts for HER in 1 M KOH.

| Material                         | Overpotential $\eta$ (V)<br>@ corresponding j | Current density<br>j(mA·cm <sup>-2</sup> ) | Tafel slope<br>(mV·dec <sup>-1</sup> ) | Reference                                   |
|----------------------------------|-----------------------------------------------|--------------------------------------------|----------------------------------------|---------------------------------------------|
| MoB microparticles               | ~0.24                                         | 20                                         | 59                                     | Angew. Chem., Int. Ed. 2012, 51, 12703      |
| CoP nanowire arrays              | 0.209                                         | 10                                         | 129                                    | J. Am. Chem. Soc. 2014, 136, 7587           |
| Co-NRCNTs                        | 0.37                                          | 10                                         | 69                                     | Angew. Chem., Int. Ed. 2014, 53, 4372       |
| MoP nanoparticles                | ~0.13                                         | 10                                         | 48                                     | Energy Environ. Sci. 2014, 7, 2624          |
| NiO/Ni@CNT                       | 0.8                                           | 10                                         | 82                                     | Nat. Commun. 2014<br>DOI:10.1038/ncomms5695 |
| MoC <sub>x</sub> nanooctahedrons | 0.151                                         | 10                                         | 59                                     | Nat. Commun. 2015<br>DOI:10.1038/ncomms7512 |
| Mo <sub>x</sub> C-Ni@NCV         | 0.126                                         | 10                                         | 93                                     | J. Am. Chem. Soc. 2015, 137, 15753          |
| CoO <sub>x</sub> @CN             | 0.232                                         | 10                                         | 115                                    | J. Am. Chem. Soc. 2015, 137, 2688           |
| Ni-MoS <sub>2</sub>              | 98                                            | 10                                         | 60                                     | Energy Environ. Sci. 2016, 7, 2624          |
| <b>Co NS</b>                     | <b>0.02</b>                                   | <b>10</b>                                  | <b>42.6</b>                            | <b>This work</b>                            |
|                                  | <b>0.06</b>                                   | <b>100</b>                                 |                                        |                                             |
|                                  | <b>0.083</b>                                  | <b>400</b>                                 |                                        |                                             |

**Table S2.** Comparison of CoFeBO NS and other non-noble metal electrocatalysts for OER in 1.0 M KOH

| Material                              | Overpotential $\eta$ (V)<br>@ corresponding j | Current density j<br>(mA·cm <sup>-2</sup> ) | Tafel slope<br>(mV·dec <sup>-1</sup> ) | Reference                                                |
|---------------------------------------|-----------------------------------------------|---------------------------------------------|----------------------------------------|----------------------------------------------------------|
| Co <sub>3</sub> O <sub>4</sub> NWs    | 0.42                                          | 13.1                                        | 72                                     | Adv. Energy Mater. 2014,<br>DOI: 10.1002/aenm.201400696  |
| $\gamma$ -CoOOH                       | 0.3                                           | 10                                          | 38                                     | Angew. Chem., Int. Ed. 2015, 54, 8722                    |
| Ni <sub>2</sub> P                     | 0.29                                          | 10                                          | 47                                     | Energy Environ. Sci. 2015, 8, 2347                       |
| Fe <sub>0.1</sub> Ni <sub>0.9</sub> O | 0.297                                         | 10                                          | 37                                     | ACS nano, 2015, 9, 5180                                  |
| NiFe/NF                               | 0.27                                          | 80                                          | 28                                     | Nat. Commun. 2015, 6, 6616                               |
| Co <sub>4</sub> N                     | 0.257                                         | 10                                          | 44                                     | Angew. Chem., Int. Ed. 2015,<br>127,14923                |
| Ni <sub>3</sub> S <sub>2</sub> /NF    | 0.26                                          | 10                                          | —                                      | J. Am. Chem. Soc. 2015, 137,<br>14023                    |
| CoP nanorods                          | 0.29                                          | 10                                          | 65                                     | Adv. Funct. Mater. 2015, 25, 7337                        |
| CoSe <sub>2</sub> sheets              | 0.47                                          | 73                                          | 64                                     | Angew. Chem., Int. Ed. 2015, 54, 12004                   |
| Co-B <sub>i</sub> NS/G                | 0.29                                          | 10                                          | 53                                     | Angew. Chem., Int. Ed. 2016, 55, 2488                    |
| FeOOH/Co/FeOOH                        | ~0.25                                         | 20                                          | 32                                     | Angew. Chem., Int. Ed. 2016, 55, 3694                    |
| CoMnP                                 | 0.33                                          | 10                                          | 61                                     | J. Am. Chem. Soc. 2016, 138, 4006                        |
| Co-P film                             | 0.345                                         | 10                                          | 47                                     | Angew. Chem., Int. Ed. 2015, 54,6251                     |
|                                       | 0.413                                         | 100                                         |                                        |                                                          |
|                                       | 0.463                                         | 500                                         |                                        |                                                          |
| h-NiS <sub>x</sub>                    | 0.18                                          | 10                                          | 96                                     | Adv. Energy Mater., 2016, DOI:<br>10.1002/aenm.201502333 |
|                                       | 0.217                                         | 100                                         |                                        |                                                          |
|                                       | 0.316                                         | 500                                         |                                        |                                                          |
| CoFeBO NS                             | 0.24                                          | 10                                          | 53                                     | This work                                                |
|                                       | 0.28                                          | 100                                         |                                        |                                                          |
|                                       | 0.31                                          | 500                                         |                                        |                                                          |

**Table S3.** Comparison of CoFeBO NS Co NS and other non-noble metal electrocatalysts for overall water splitting in 1.0 M KOH.

| Material                                                                                | Voltage (V) | Current density (mA·cm <sup>-2</sup> ) | Reference                                                |
|-----------------------------------------------------------------------------------------|-------------|----------------------------------------|----------------------------------------------------------|
| NiSe NWs   NiSe NWs                                                                     | 1.63        | 10                                     | Angew. Chem., Int. Ed. 2015, 54, 9351                    |
| Ni <sub>5</sub> P <sub>4</sub>   Ni <sub>5</sub> P <sub>4</sub>                         | ~1.7        | 10                                     | Angew. Chem., Int. Ed. 2015, 127, 12538                  |
| CoP   CoP                                                                               | 1.74        | 100                                    | Angew. Chem., Int. Ed. 2015, 54, 6251                    |
| CoP-MNA   CoP-MNA                                                                       | 1.62        | 10                                     | Adv. Funct. Mater. 2015, 25, 7337                        |
| Ni/NiP   Ni/NiP                                                                         | 1.61        | 10                                     | Adv. Funct. Mater. 2016,<br>DOI: 10.1002/adfm.201505626  |
| NiFe LDH   NiFe LDH                                                                     | 1.7         | 10                                     | Science, 2014, 345, 1593                                 |
|                                                                                         | 1.8         | 20                                     |                                                          |
| CoMnO@CN  <br>CoMnO@CN                                                                  | 1.7         | 54                                     | J. Am. Chem. Soc., 2015, 137, 14305                      |
|                                                                                         | 1.8         | 108                                    |                                                          |
| NiFeO <sub>x</sub>   NiFeO <sub>x</sub>                                                 | 1.7         | 30                                     | Nat. Commun. 2015,<br>DOI:10.1038/ncomms8261             |
|                                                                                         | 1.8         | 100                                    |                                                          |
| EG/Co <sub>0.85</sub> Se/NiFe-LDH  <br>EG/Co <sub>0.85</sub> Se/NiFe-LDH                | 1.67        | 10                                     | Energy Environ. Sci., 2016, 9, 478                       |
|                                                                                         | 1.71        | 20                                     |                                                          |
| NiCo <sub>2</sub> O <sub>4</sub>   Ni <sub>0.33</sub> Co <sub>0.67</sub> S <sub>2</sub> | 1.72        | 10                                     | Adv. Energy Mater. 2015,<br>DOI: 10.1002/aenm.201402031. |
| NiFe LDH   NiO/Ni-CNT                                                                   | 1.5         | 10                                     | Nat. Commun. 2014,<br>DOI:10.1038/ncomms5695.            |
| NiFe LDH   Cr <sub>2</sub> O <sub>3</sub> /NiO-Ni                                       | 1.75        | 200                                    | Angew. Chem., Int. Ed. 2015, 54, 11989                   |
| <b>CoFeBO NS   Co NS</b>                                                                | <b>1.5</b>  | <b>10</b>                              | <b>This work</b>                                         |
|                                                                                         | <b>1.62</b> | <b>100</b>                             |                                                          |
|                                                                                         | <b>1.68</b> | <b>200</b>                             |                                                          |
